# Supplementary material for: In situ quantification of volatile ethanol in complex components based on colorimetric sensor array
Source: Royal Society of Chemistry journal article supplement (doi:10.1039/c7ay01639e), 2017-01-01
Supplement: c7ay01639e1.pdf [file c7ay01639e1.pdf]

## **In-situ quantification of volatile ethanol content in complex components based on colorimetric sensor array**

Hao Lin<sup>1</sup>, Zhong-xiu Man<sup>1</sup>, Bin-bin Guan<sup>1</sup>, Quan-sheng Chen<sup>1</sup>, Hong-juan Jin<sup>1</sup>, Zhao-li Xue<sup>2\*</sup>

(School of Food and Biological Engineering, Jiangsu University, Zhenjiang, Jiangsu 212013, P. R. China)

(School of Chemistry and Chemical Engineering, Jiangsu University, Zhenjiang, Jiangsu 212013, P. R. China)

Table S1 Reference measurement of ethanol in calibration and prediction sets.

| Subsets         | Units (%) | Sample number | Range       | Mean  | Standard deviation |
|-----------------|-----------|---------------|-------------|-------|--------------------|
| Calibration set | v/v       | 40            | 18.03-53.94 | 34.59 | 10.45              |
| Prediction set  | v/v       | 20            | 19.73-49.57 | 33.57 | 9.52               |

---

H. Lin, Z. Man, B. Guan, H. Jin, Z. Xue\*

School of Chemistry and Chemical Engineering, Jiangsu University,  
Zhenjiang City, 212013, PR China

Email: [linhaolt794@163.com](mailto:linhaolt794@163.com), Tel: +86 511 88790201

Table S2 The name and abbreviation of porphyrins

| Number of compounds | Name                                                                       | Abbreviation |
|---------------------|----------------------------------------------------------------------------|--------------|
| 1                   | 5,10,15,20-Tetraphenyl-21H,23H-porphyrine                                  | TPP          |
| 2                   | 5,10,15,20-Tetraphenyl-21H,23H-porphyrine manganese                        | TPP-Mn       |
| 3                   | 5,10,15,20-Tetraphenyl-21H,23H-porphyrine zinc                             | TPP-Zn       |
| 4                   | 5,10,15,20-Tetraphenyl-21H,23H-porphyrine cobalt(II)                       | TPP-Co       |
| 5                   | 5,10,15,20-Tetraphenyl-21H,23H-porphyrine nickel                           | TPP-Ni       |
| 6                   | 5,10,15,20-Tetraphenyl-21H,23H-porphyrine copper(II)                       | TPP-Cu       |
| 7                   | 5,10,15,20-Tetraphenyl-21H,23H-porphyrine palladium (II)                   | TPP-Pd       |
| 8                   | 5,10,15,20-Tetraphenyl-21H,23H-porphyrine manganese(III) Chloride          | TPP-Cl- Mn   |
| 9                   | 5,10,15,20-Tetrakis(4-fluorophenyl)-21H,23H-porphyrine manganese(II)       | TPP-F -Mn    |
| 10                  | Octaethyl-21H,23H-porphyrine manganese(III) chloride                       | OEP-Cl- Mn   |
| 11                  | 5,10,15,20-Tetrakis(4-methoxyphenyl)-21H,23H-porphyrine manganese(II)      | CH3O-TPPMn   |
| 12                  | 6,13,20,21-tetratolyl[14]tribenzotriphyrin(2.1.1) Manganese(I) Tricarbonyl | CH3-Trip-Mn  |

Table S3 Response values of the red, green, and blue (RGB) component with different porphyrins after exposure to 60% ethanol at 35°C. The data (repeated four times) displaced in the table are in the type of mean  $\pm$  standard deviation.

| Porphyrins | R component      | G component     | B component      |
|------------|------------------|-----------------|------------------|
| TPP        | 1.73 $\pm$ 1.40  | 2.42 $\pm$ 0.67 | 7.66 $\pm$ 3.91  |
| TPP-Mn     | 17.05 $\pm$ 4.73 | 9.14 $\pm$ 2.86 | 36.90 $\pm$ 8.35 |
| TPP-Zn     | 6.61 $\pm$ 1.19  | 1.79 $\pm$ 0.92 | 22.15 $\pm$ 1.20 |
| TPP-Co     | 2.72 $\pm$ 0.59  | 2.19 $\pm$ 0.62 | 4.59 $\pm$ 0.45  |
| TPP-Ni     | 5.71 $\pm$ 0.35  | 3.94 $\pm$ 1.62 | 0.63 $\pm$ 0.79  |
| TPP-Cu     | 3.26 $\pm$ 0.81  | 2.33 $\pm$ 0.79 | 5.67 $\pm$ 1.70  |
| TPP-Pd     | 2.66 $\pm$ 0.50  | 1.53 $\pm$ 0.40 | 2.91 $\pm$ 0.48  |

Q band of porphyrins existing in the visible region related to optical property for light harvesting in the molecular reaction of VOCs and porphyrins. Furthermore, it has been reported that the Q bands formation of porphyrins mainly arise from the electron transition from the HOMO and HOMO-1 to the LUMO and LUMO+1 orbitals. Therefore, it is important to understand the energy level of four orbitals (HOMO, HOMO-1, LUMO and LUMO+1). In this study, TD-DFT was used to treat the changes in energy of four orbitals energy levels before and after binding to ethanol, resulted in Table S4.

Table S4. Orbital energy level and geometry structure changes after porphyrins binding with ethanol

| Porphyrins | Value(B) | Coefficient of variation (B) | HOMO-LUMO | HOMO-1 -LUMO+1 | Distance |
|------------|----------|------------------------------|-----------|----------------|----------|
| TPP        | 7.66     | 0.5104                       | 2.7152    | 3.0177         | 0        |
| TPP-Mn     | 36.9     | 0.2263                       | 2.5045    | 2.8770         | 0.136    |
| TPP-Zn     | 22.15    | 0.0542                       | 2.8030    | 3.0079         | 0.268    |
| TPP-Co     | 4.59     | 0.0980                       | 2.7375    | 2.9157         | 0.079    |
| TPP-Ni     | 0.63     | 1.2540                       | 2.9720    | 3.0594         | 0        |
| TPP-Cu     | 5.67     | 0.2998                       | 2.8820    | 3.0158         | 0.042    |
| TPP-Pd     | 2.91     | 0.1649                       | 3.0098    | 3.0977         | 0.001    |

Since there are no metal atoms in the center of TPP, it was set to zero by default. Fig. 3(a) showed the distance of Mn out of planarity before and after TPP-Mn binding to ethanol. Before exposure to ethanol, the distance of Mn out of planarity was 0, and the value was 0.136 after binding to ethanol. Fig. 3(b) showed the charges of TPP-Mn before and after binding to ethanol. Prior to the TPP-Mn binding to ethanol, the charges of four N atoms were -0.614, -0.608, -0.643, -0.593 respectively. While after TPP-Mn binding to ethanol, charges of four N atoms changed to -0.570, -0.584, -0.588, -0.568.

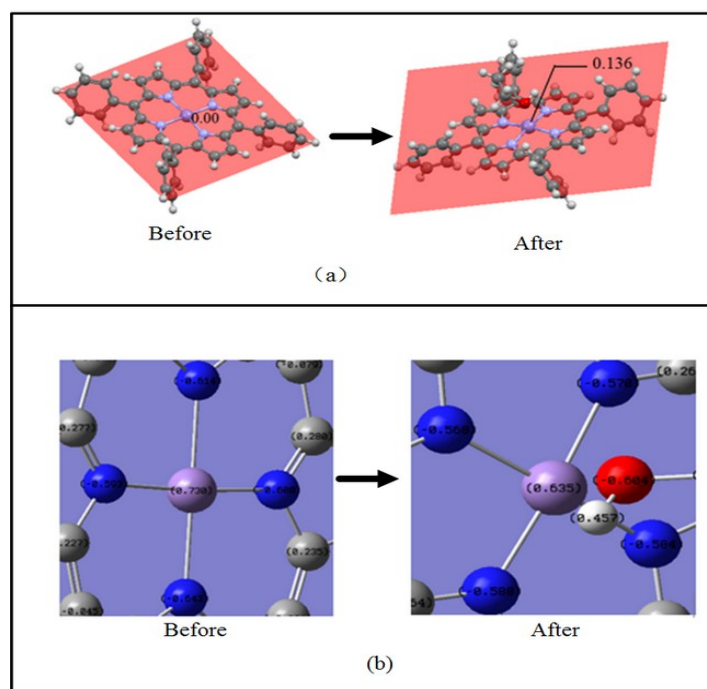

Fig. S1 Changes of TPP-Mn after binding with ethanol in geometry structure changes (a) and charge distribution (b)

Table S5 Changes of the charge distribution in the process of ethanol binding to porphyrins

| Porphyrins | Value (B) | Coefficient of variation (B) | Charge distribution |        |        |        |        |        |        |
|------------|-----------|------------------------------|---------------------|--------|--------|--------|--------|--------|--------|
|            |           |                              | Metals              | N1     | N2     | N3     | N4     | N      | Total  |
| TPP        | 7.66      | 0.5104                       | -                   | -0.038 | 0      | 0.001  | 0      | -0.037 | -0.037 |
| TPP-Mn     | 36.9      | 0.2263                       | -0.095              | 0.025  | 0.044  | 0.055  | 0.024  | 0.148  | 0.053  |
| TPP-Zn     | 22.15     | 0.0542                       | -0.022              | 0.029  | 0.020  | 0.020  | 0.036  | 0.105  | 0.083  |
| TPP-Co     | 4.59      | 0.0980                       | -0.115              | -0.026 | -0.037 | -0.034 | -0.029 | -0.126 | -0.241 |
| TPP-Ni     | 0.63      | 1.2540                       | -0.043              | -0.007 | 0.009  | 0.01   | 0.009  | 0.021  | -0.022 |

|        |      |        |        |        |       |        |        |        |        |
|--------|------|--------|--------|--------|-------|--------|--------|--------|--------|
| TPP-Cu | 5.67 | 0.2998 | -0.051 | 0.010  | 0.013 | 0.012  | -0.002 | 0.033  | -0.018 |
| TPP-Pd | 2.91 | 0.1649 | -0.141 | -0.003 | 0     | -0.001 | -0.007 | -0.011 | -0.130 |

Table S6 Quantum chemistry calculation results of different porphyrin binding with ethanol

| Porphyrins | Value(B) | Coefficient of variation (B) | HOMO-LUMO | HOMO-1-LUMO+1 | Dipole (before reaction) | Dipole (after reaction) | Total N charge | Distance |
|------------|----------|------------------------------|-----------|---------------|--------------------------|-------------------------|----------------|----------|
| TPP        | 7.66     | 0.5104                       | 2.7152    | 3.0177        | 0.001                    | 1.3911                  | -0.037         | -0.037   |
| TPP-Mn     | 36.9     | 0.2263                       | 2.5045    | 2.8770        | 0.599                    | 2.3990                  | 0.148          | 0.053    |
| TPP-Zn     | 22.15    | 0.0542                       | 2.8030    | 3.0079        | 0.017                    | 3.8693                  | 0.105          | 0.083    |
| TPP-Co     | 4.59     | 0.0980                       | 2.7375    | 2.9157        | 0.063                    | 2.7635                  | -0.126         | -0.241   |
| TPP-Ni     | 0.63     | 1.2540                       | 2.9720    | 3.0594        | 0.003                    | 1.6789                  | 0.021          | -0.022   |
| TPP-Cu     | 5.67     | 0.2998                       | 2.8820    | 3.0158        | 0.011                    | 0.9689                  | 0.033          | -0.018   |
| TPP-Pd     | 2.91     | 0.1649                       | 3.0098    | 3.0977        | 0.010                    | 1.441                   | -0.011         | -0.130   |

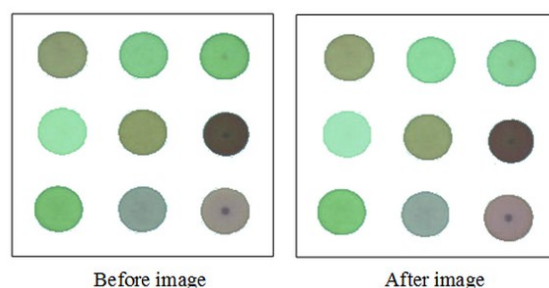

Fig. S2 The before and after image of colorimetric sensor array

In the process of variable selection, the data origin from the response value after exposure to ethanol constituted a 60 x 27 independent variable matrix X (60 samples and 27 variables), the actual ethanol content of samples were termed as Y. The

parameters of genetic algorithm were set as follows: population size is 60; cross rate is 0.8; mutation probability is 0.01; and frequency of hybridization is 100. The definition of fitness function as:

$$F = \frac{1}{1 + RMSECV}$$

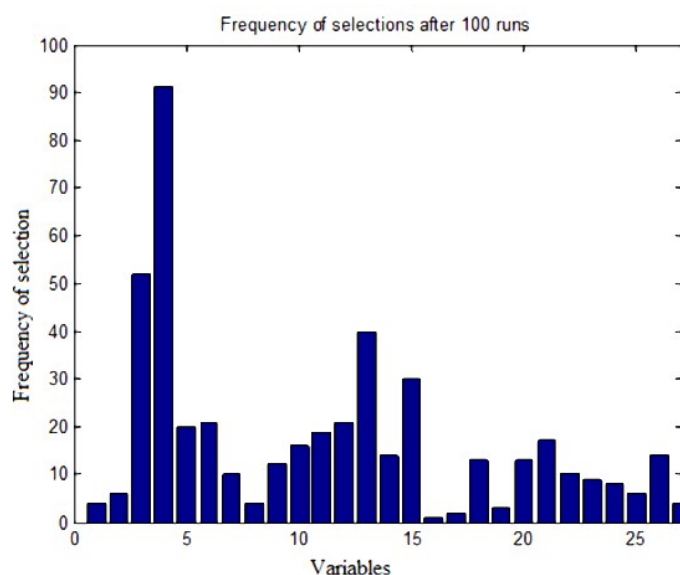

Fig. S3 The histogram of frequency selection of each variable

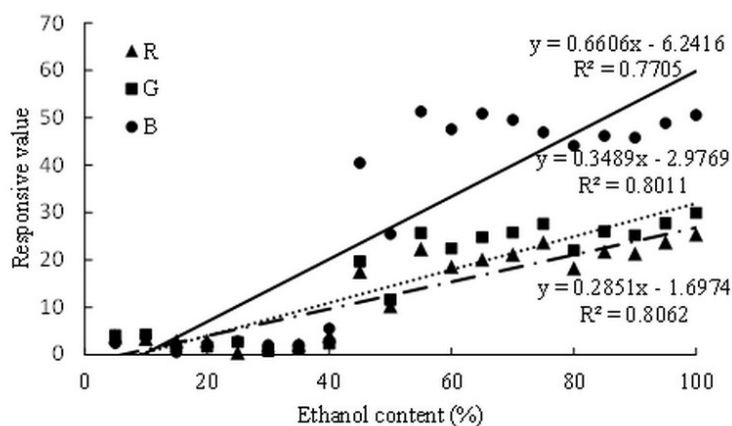

Fig. S4 Responsive values of TPP-CI-Mn in the red, green, and blue (RGB) component after exposure to pure ethanol/water solution at various concentrations (5%-100%). Linear regression analysis and equations were also included.

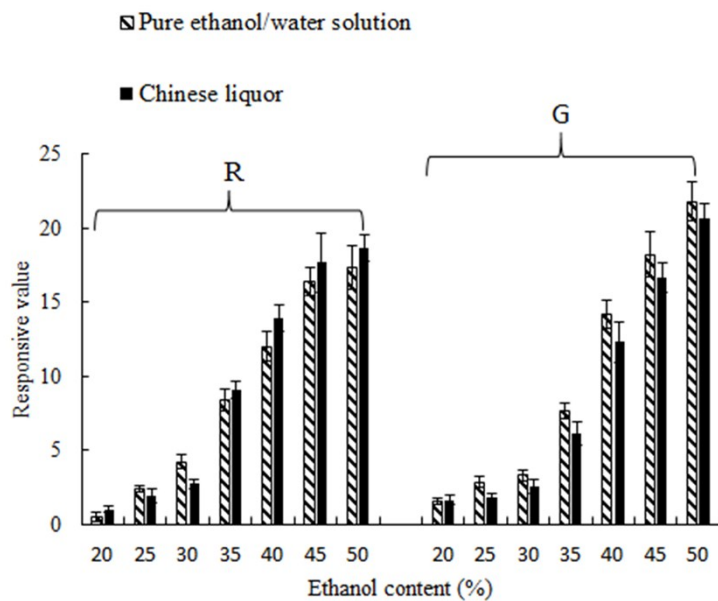

Fig. S5 Comparative analysis of TPP-Cl-Mn after exposure to pure ethanol/water solution and Chinese liquor in red and green components



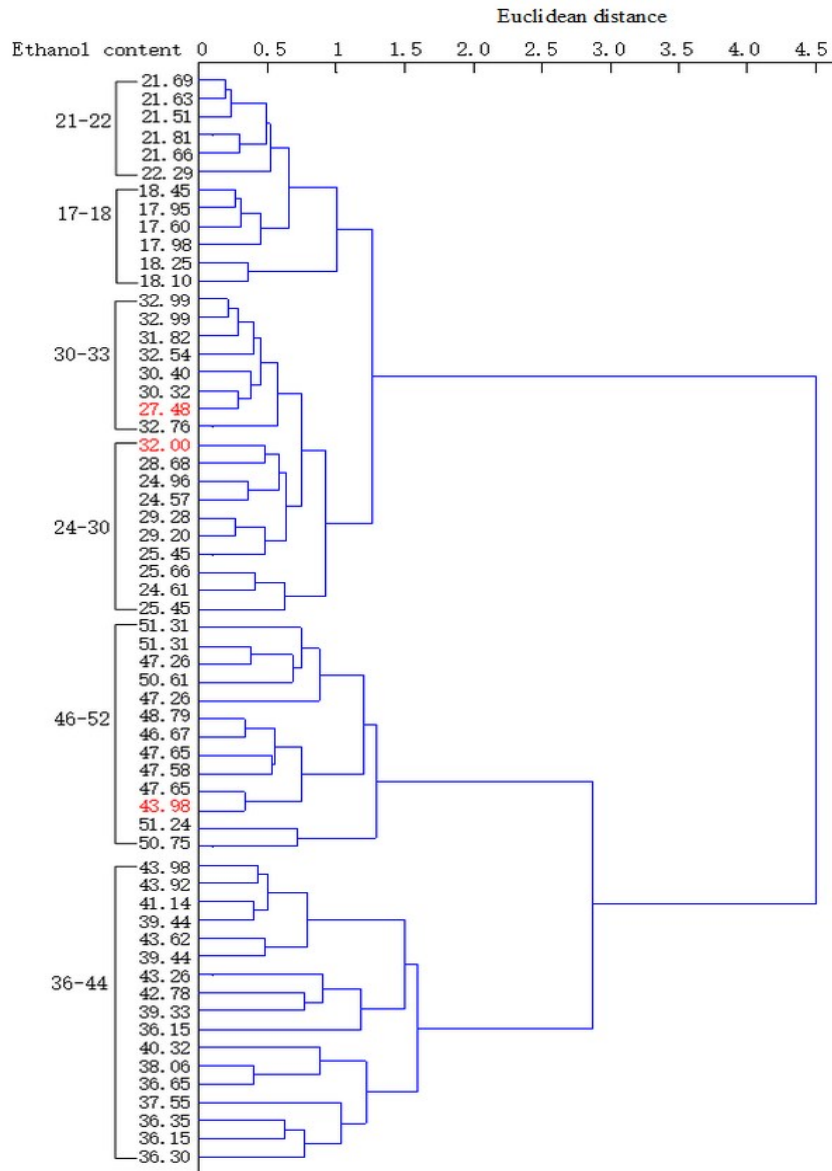

Fig. S6 Hierarchical cluster analysis (HCA) dendrogram of the six variables for 60 Chinese liquor with different ethanol.
